# Supplementary material
Source: PubMed Central journal article supplement (PMC2993597)
Supplement: JCI43910sd.pdf [file JCI43910sd.pdf]

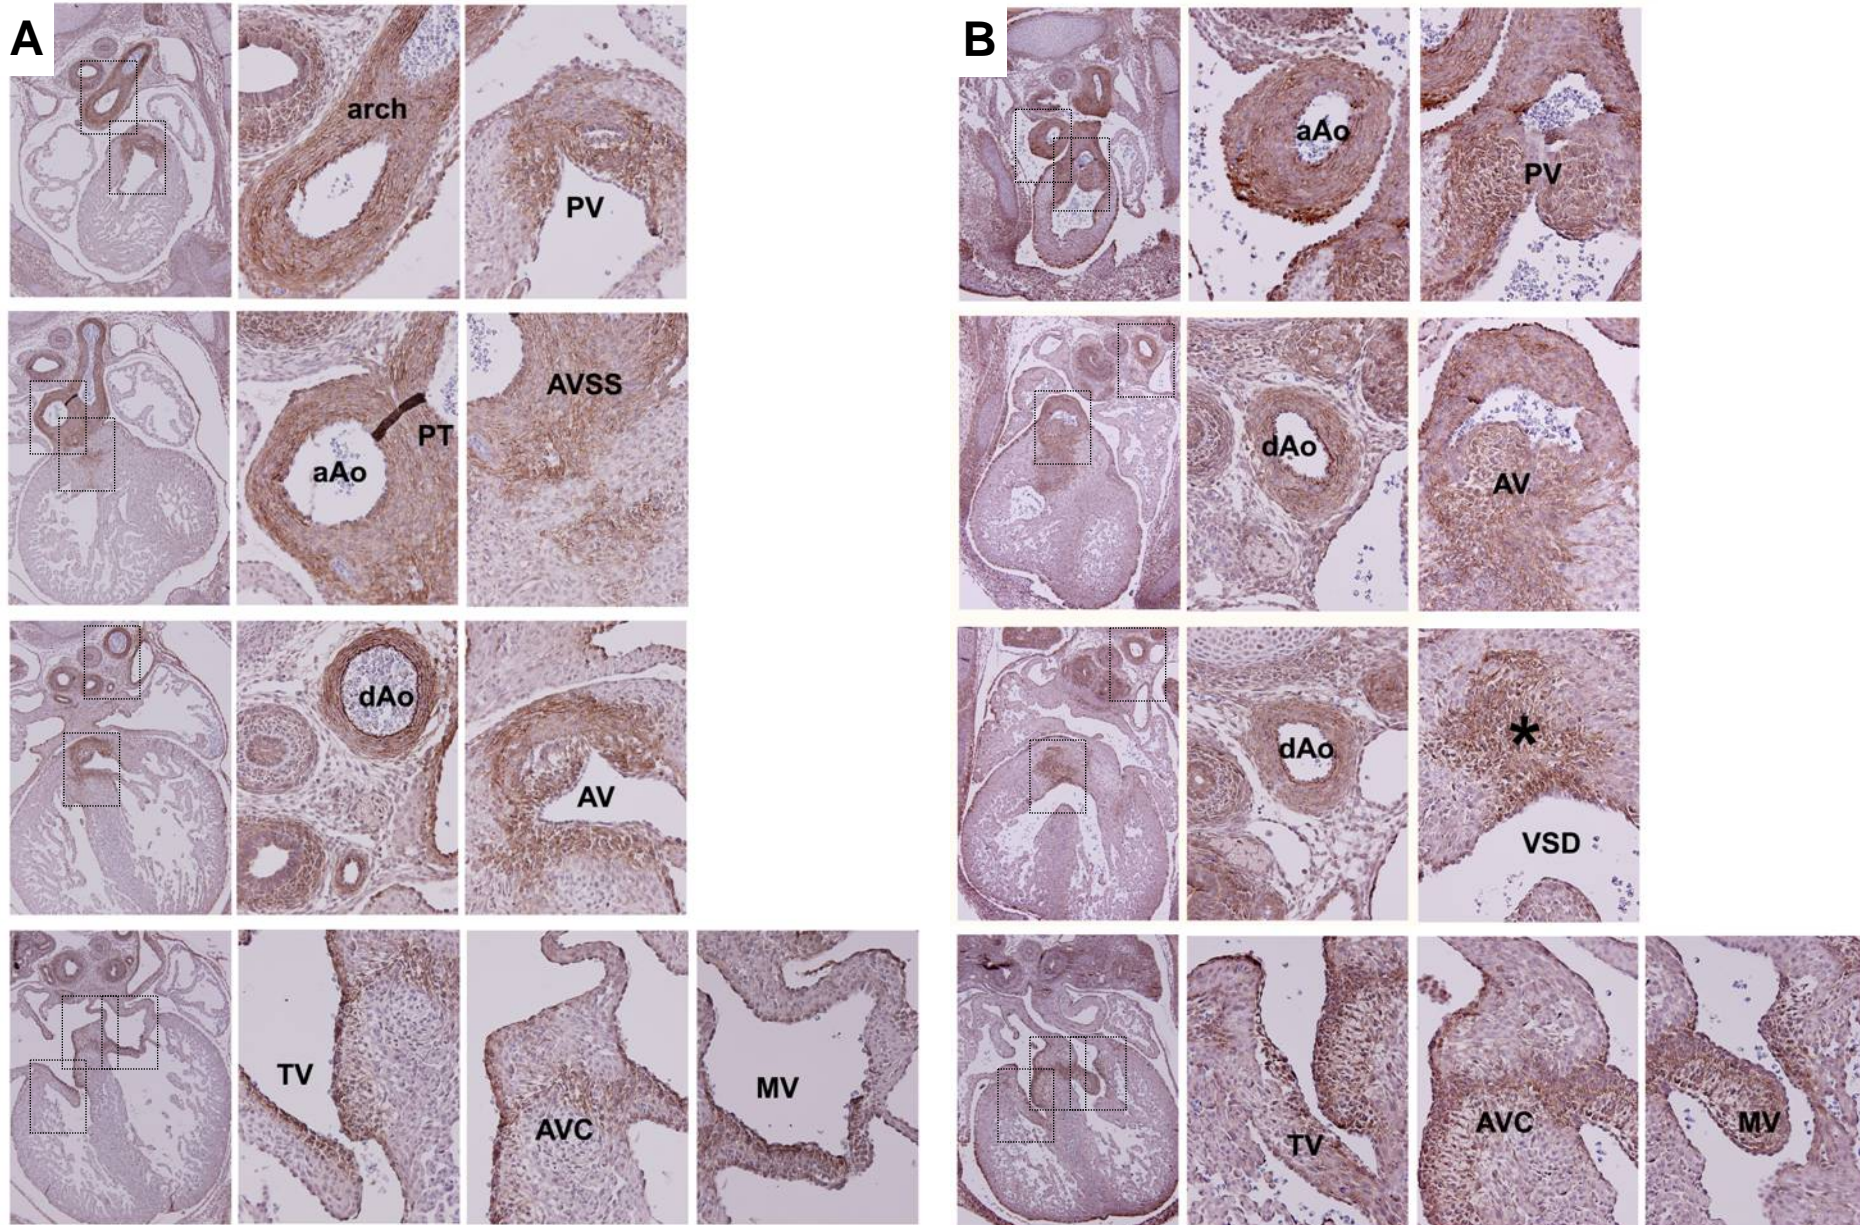

**Supplementary Figure 1** Immunohistochemistry staining of *Sos1* with hematoxylin counterstaining. Note brown cytoplasmic staining of *Sos1* in E13.5 (**A**) *Wt* and (**B**) *Sos1*<sup>+/*EK*</sup> embryos. Right panels show higher magnification. Arch, arch of aorta; PV, pulmonary valve; aAo, ascending aorta; PT, pulmonary trunk; AVSS, aortica-pulmonary spiral septum; dAo, descending aorta; AV, aortic valve; TV, tricuspid valve; AVC, atrioventricular cushion; MV, mitral valve; VSD, ventricular septal defect; \*, site of fusion of the bulbar ridges with the interventricular septum.

**A**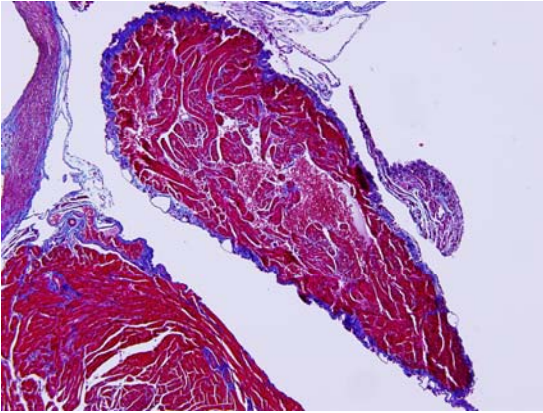**B**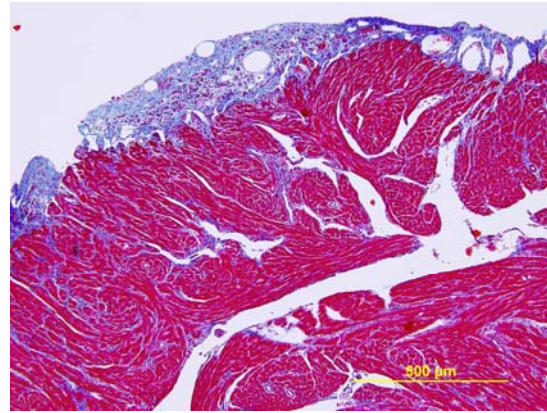**C**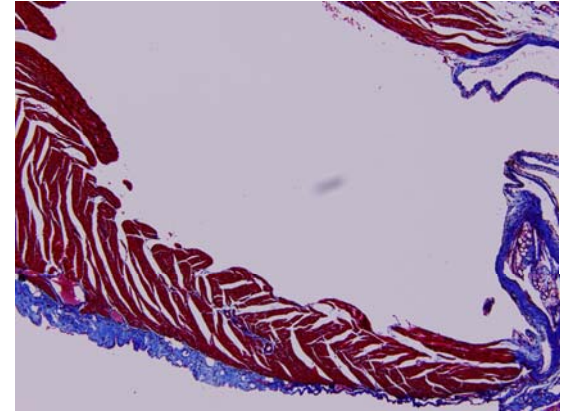

**Supplementary Figure 2** Masson-Trichrome staining of heart tissue showing fibrosis in 4-month old *Sos1<sup>EK/EK</sup>* mice. Note blue collagen staining in (A) right atrial epicardium, (B) left ventricular epicardium and myocardium and (C) right ventricular epicardium.

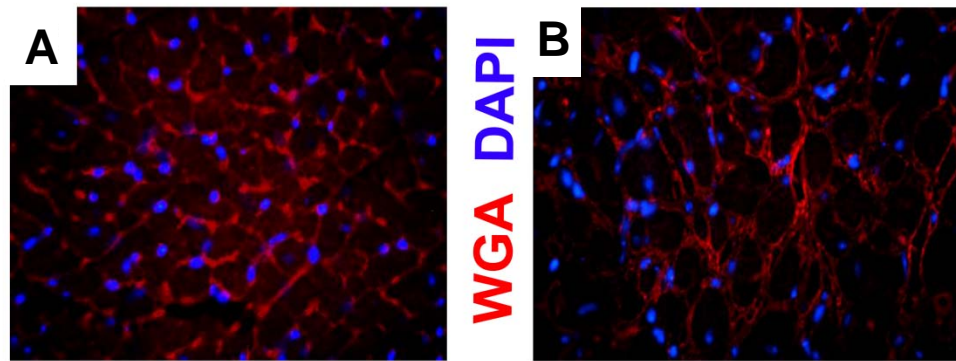

**Supplementary Figure 3** Wheat germ agglutinin (WGA) staining of left ventricular wall sections in 9-month-old (A) *Wt* and (B) *Sos1<sup>+/EK</sup>* mice. Note larger size and disorganized structure of *Sos1<sup>+/EK</sup>* cardiomyocytes.

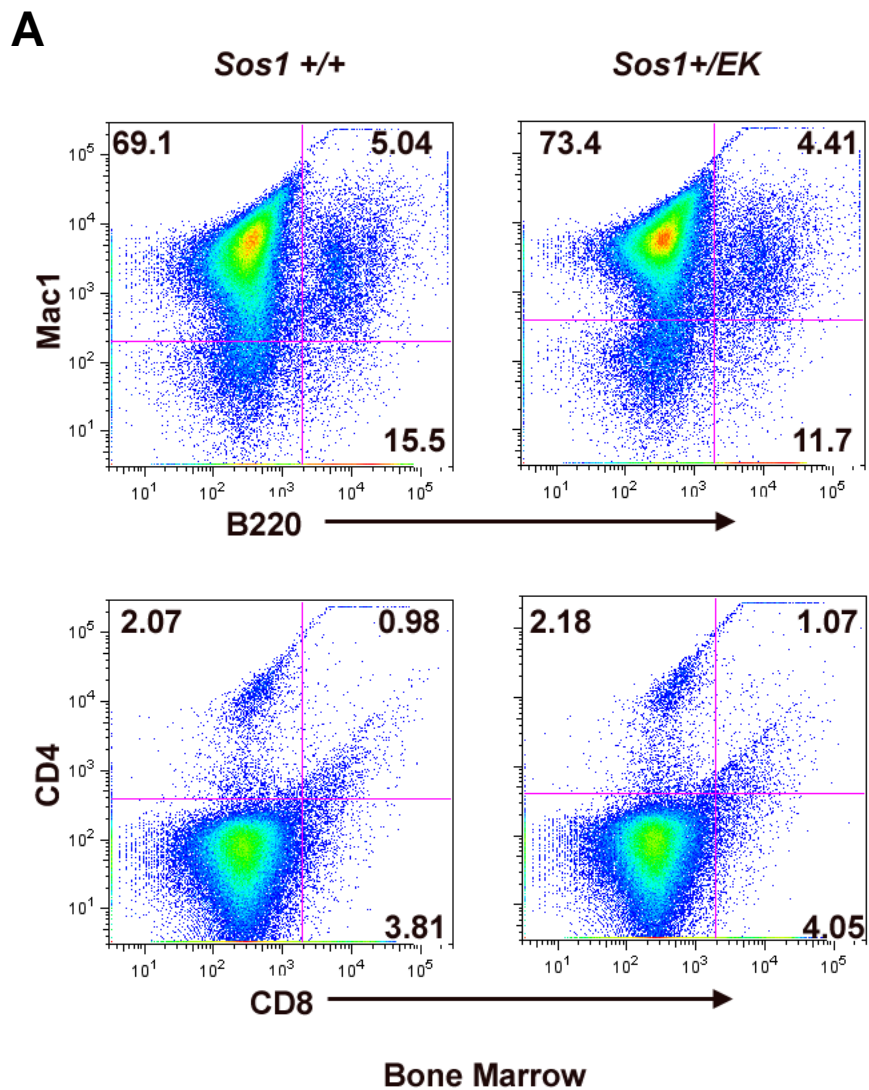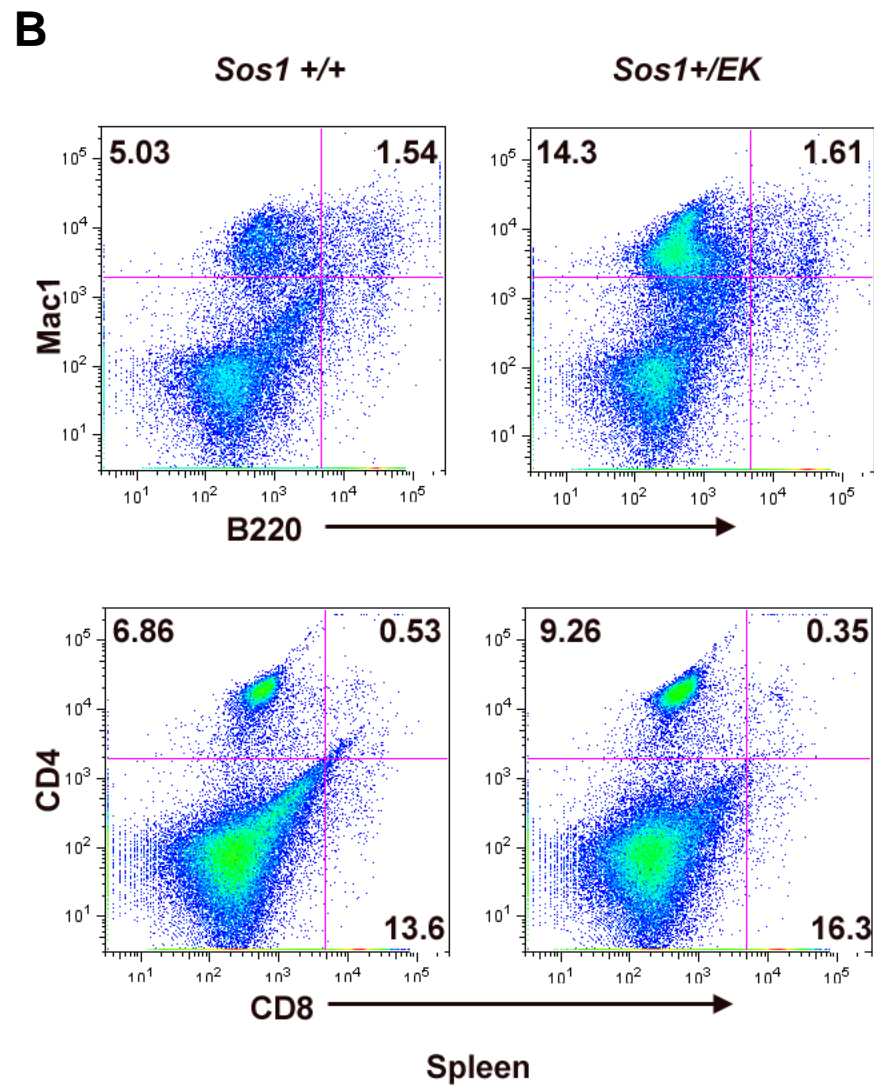

**Supplementary Figure 4** Flow cytometric analysis of (A) bone marrow and (B) spleen of 5-month-old *Wt* and *Sos1*<sup>+/*EK*</sup> mice.

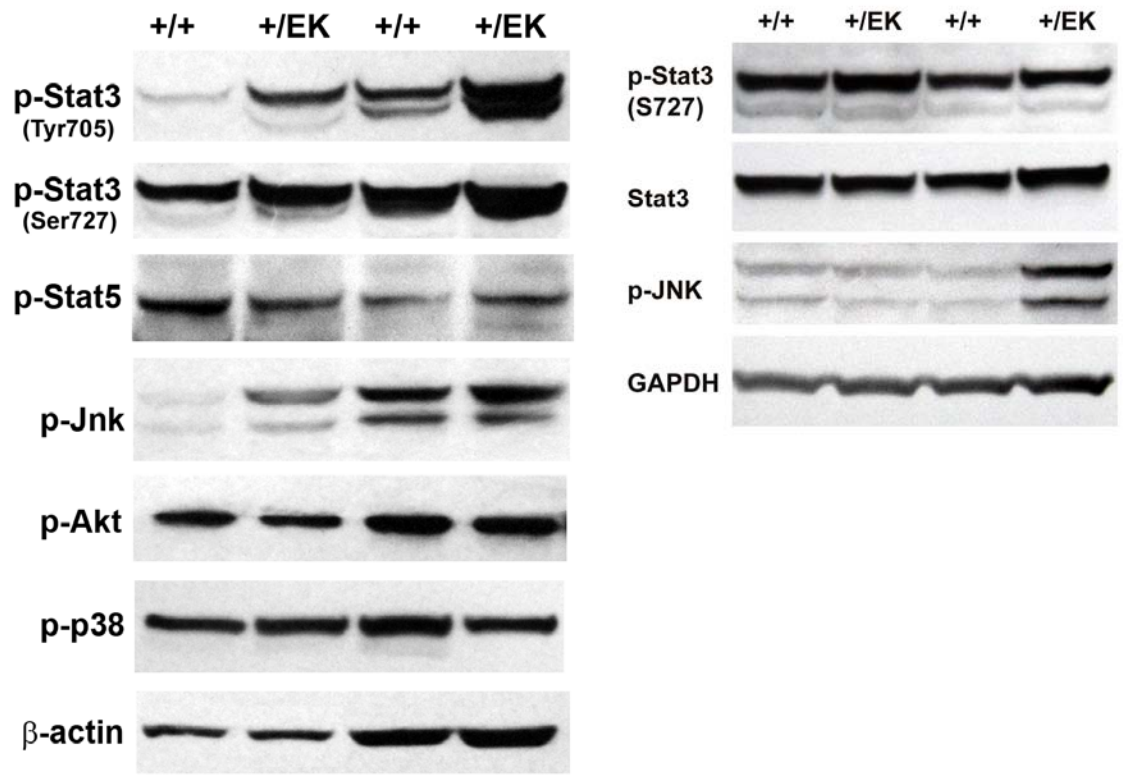

**Supplementary Figure 5** Representative immunoblotting of phospho-proteins in *Sos1* heart tissue.

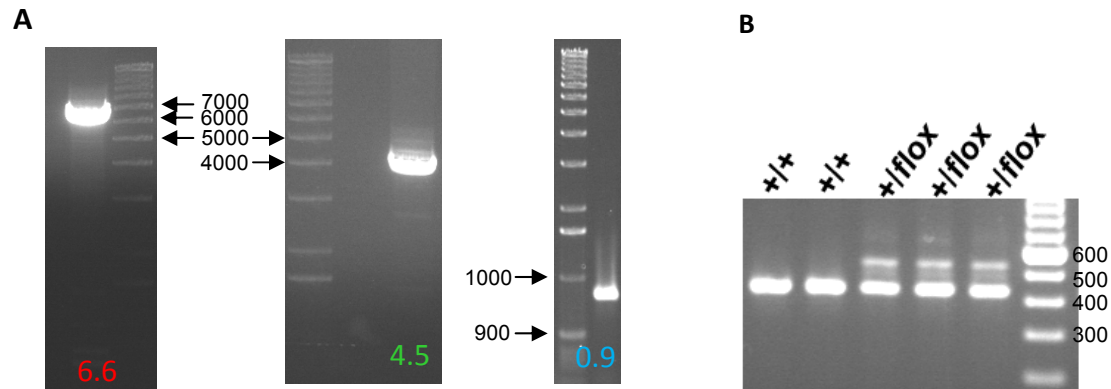

**Supplementary Figure 6 (A)** Representative results of long-range PCR screening of a positive ES cell clone carrying the targeted *Sos1<sup>EK</sup>* allele. Primer pairs are indicated in Fig. 1A in respective red, green and blue color, numbers indicate the size of PCR bands in kilo-base pairs (bp). Numbers indicate bp of DNA ladder. **(B)** Representative PCR results for genotyping *Sos1<sup>EK</sup>* targeted locus using primer pairs indicated in purple in Fig. 1A. The mutant allele rendered a band that is ~100 bp more than the *Wt* allele due to the presence of *loxP* construction site. Numbers indicate bp of DNA ladder.

**Supplementary Table 1 Blood pressure of *Sos1* mice**

|                               | <u><b><i>Sos1</i><sup>+/+</sup> (n=5)</b></u> | <u><b><i>Sos1</i><sup>+/EK</sup> (n=5)</b></u> | <b>p</b> |
|-------------------------------|-----------------------------------------------|------------------------------------------------|----------|
| <b>Systolic-5month (mmHg)</b> | 127.97 ±9.06                                  | 114.7 ±9.13                                    | 0.82     |
| <b>Systolic-8month (mmHg)</b> | 117.79 ±5.83                                  | 108.6 ±6.02                                    | 0.83     |

**Supplementary Table 2 Complete blood count of 5-month-old *Sos1* mice**

|             | <i>Sos1</i> <sup>+/+</sup> (n=4)    |        | <i>Sos1</i> <sup>+/<i>EK</i></sup> (n=6) |        |   |
|-------------|-------------------------------------|--------|------------------------------------------|--------|---|
|             | Mean number<br>x10 <sup>3</sup> /μl | SD     | Mean number<br>x10 <sup>3</sup> /μl      | SD     |   |
| <b>WBC</b>  | 2.06                                | 1.08   | 4.74                                     | 3.37   | * |
| <b>NE</b>   | 0.48                                | 0.22   | 1.57                                     | 1.03   |   |
| <b>LY</b>   | 1.38                                | 0.71   | 2.68                                     | 1.97   |   |
| <b>MO</b>   | 0.15                                | 0.07   | 0.44                                     | 0.51   |   |
| <b>EO</b>   | 0.04                                | 0.07   | 0.04                                     | 0.03   |   |
| <b>BA</b>   | 0.01                                | 0.02   | 0.02                                     | 0.02   |   |
| <b>RBC</b>  | 7.95                                | 0.63   | 7.24                                     | 3.38   |   |
| <b>Hb</b>   | 11.63                               | 0.89   | 12.00                                    | 1.56   |   |
| <b>HCT</b>  | 43.88                               | 2.57   | 44.70                                    | 5.73   |   |
| <b>MCV</b>  | 55.33                               | 2.97   | 53.35                                    | 3.25   |   |
| <b>MCH</b>  | 14.65                               | 1.04   | 14.28                                    | 0.30   |   |
| <b>MCHC</b> | 26.58                               | 2.54   | 26.83                                    | 1.20   |   |
| <b>RDW</b>  | 17.98                               | 1.58   | 20.05                                    | 3.36   |   |
| <b>PLT</b>  | 704.25                              | 119.98 | 463.67                                   | 292.66 |   |
| <b>MPV</b>  | 5.25                                | 0.13   | 6.02                                     | 0.72   |   |

WBC, total white blood cells; NE, neutrophils; LY, lymphocytes; MO, monocytes; EO, eosinophils; BA, basophils; RBC, total red blood cells; Hb, hemoglobin; HCT, hematocrit; MCV, mean corpuscular volume; MCH, mean corpuscular hemoglobin; MCHC, mean corpuscular hemoglobin concentration; RDW, red blood cell distribution width; PLT, platelet; MPV, mean platelet volume; \*, p<0.05.



### Supplementary Table 3 Primer sequences

| Name/Gene       | Forward                  | Reversed                 |
|-----------------|--------------------------|--------------------------|
| 846-ex15-ex16-F | GGTTTGAGAAATGTATTGTA     |                          |
| 846-ex17-R      |                          | AGGCACACACGGTGGATTA      |
| ANF             | GGCCATATTGGAGCAAATCCTGTG | CATGACCTCATCTTCTACCGGCAT |
| BNP             | TGGGAAGTCCTAGCCAGTCTC    | CTGTCTCTGGGCCATTTCT      |
| $\beta$ -MHC    | GAGGGAGACCTGAAGCTGAC     | CTCATCCAACCTGCTGCTTGT    |
